# Supplementary material for: Drug–Drug Interactions Involving High-Alert Medications that Lead to Interaction-Associated Symptoms in Pediatric Intensive Care Patients: A Retrospective Study
Source: PubMed Central journal article supplement — Paediatr Drugs. 2024 Jul 4;26(5):619–29. doi: 10.1007/s40272-024-00641-x (PMC11335839; doi:10.1007/s40272-024-00641-x), 2024-07-04
Supplement: 40272_2024_641_MOESM1_ESM.pdf [file 40272_2024_641_MOESM1_ESM.pdf]

**Article title:** Drug-drug interactions involving high-alert medications that lead to interaction-associated symptoms in pediatric intensive care patients: a retrospective study

**Journal name:** Pediatric drugs

**Author names:** Lisa Marie Kiesel, Astrid Bertsche, Wieland Kiess, Manuela Siekmeyer, Thilo Bertsche, Martina Patrizia Neininger

**Corresponding author:** Thilo Bertsche, Drug Safety Center and Clinical Pharmacy, Institute of Pharmacy, Medical Faculty, Leipzig University, Bruederstr. 32, 04103 Leipzig, Germany; email to [thilo.bertsche@uni-leipzig.de](mailto:thilo.bertsche@uni-leipzig.de)

Online Resource 1: Definition of symptoms detected after potential drug-drug interactions involving high-alert medication

| Symptom                  | Definition of symptom                                                                                                                                                                                                                                                                                                                                                                                                                                                                                                                                                          |
|--------------------------|--------------------------------------------------------------------------------------------------------------------------------------------------------------------------------------------------------------------------------------------------------------------------------------------------------------------------------------------------------------------------------------------------------------------------------------------------------------------------------------------------------------------------------------------------------------------------------|
| Decreased blood pressure | <p>Blood pressure falls below the lower age-dependent standard range for diastolic or diastolic blood pressure<sup>a</sup></p> <ul style="list-style-type: none"> <li>• &lt; 12 months: &lt; 37/72 mmHg (diastolic/systolic)</li> <li>• 1 – &lt; 4 years: &lt; 46/80 mmHg (diastolic/systolic)</li> <li>• 4 - &lt; 7 years: &lt; 47/80 mmHg (diastolic/systolic)</li> <li>• 7 - &lt; 11 years: &lt; 52/83 mmHg (diastolic/systolic)</li> <li>• 11 - &lt; 13 years: &lt; 58/95 mmHg (diastolic/systolic)</li> <li>• ≥14 years: &lt; 55/100 mmHg (diastolic/systolic)</li> </ul> |
| Decreased heart rate     | <p>Heart rate falls below the lower age-dependent standard range for heart rate<sup>a</sup></p> <ul style="list-style-type: none"> <li>• &lt; 2 years: &lt; 80 bpm</li> <li>• 2 – &lt; 10 years: &lt; 60 bpm</li> <li>• ≥10 years: &lt; 50 bpm</li> </ul>                                                                                                                                                                                                                                                                                                                      |
| Fever                    | <p>Body temperature exceeds the upper age-dependent standard range for fever:</p> <ul style="list-style-type: none"> <li>• &lt; 3 months: &gt; 38.0 °C</li> <li>• ≥ 3 months: &gt; 38.5 °C</li> </ul>                                                                                                                                                                                                                                                                                                                                                                          |
| Hypercalcemia            | <p>Blood calcium exceeds the upper age-dependent reference range</p> <ul style="list-style-type: none"> <li>• &lt; 1 month: &gt; 2.78 mmol/l</li> <li>• ≥ 1 month: &gt; 2.6 mmol/l</li> </ul>                                                                                                                                                                                                                                                                                                                                                                                  |
| Hyperkalemia             | <p>Blood potassium exceeds the upper age-dependent reference range</p> <ul style="list-style-type: none"> <li>• &lt; 1 months: &gt; 6.1 mmol/l</li> <li>• 1 - 12 months: years: &gt; 5.8 mmol/l</li> <li>• ≥ 1 year: &gt; 5.2 mmol/l</li> </ul>                                                                                                                                                                                                                                                                                                                                |
| Hypocalcemia             | <p>Blood calcium falls below the lower reference range</p> <ul style="list-style-type: none"> <li>• &lt; 1 month: &lt; 1.76 mmol/l</li> <li>• ≥ 1 month: &lt; 2.1 mmol/l</li> </ul>                                                                                                                                                                                                                                                                                                                                                                                            |
| Hypokalemia              | <p>Blood potassium falls below the lower age-dependent reference range</p> <ul style="list-style-type: none"> <li>• &lt; 1 month: &lt; 3.6 mmol/l</li> <li>• 1 - 12 months: years: &lt; 3.7 mmol/l</li> <li>• ≥ 1 year: &lt; 3.1 mmol/l</li> </ul>                                                                                                                                                                                                                                                                                                                             |

| Symptom                  | Definition of symptom                                                                                                                                                                                                                                                                                                                                                                                                                                                                                                                                                          |
|--------------------------|--------------------------------------------------------------------------------------------------------------------------------------------------------------------------------------------------------------------------------------------------------------------------------------------------------------------------------------------------------------------------------------------------------------------------------------------------------------------------------------------------------------------------------------------------------------------------------|
| Hypomagnesemia           | <p>Blood magnesium falls below the lower age-dependent reference range</p> <ul style="list-style-type: none"> <li>• 0 - 6 days: &lt; 0.48 mmol/l</li> <li>• ≥ 6 days: &lt; 0.65 mmol/l</li> </ul>                                                                                                                                                                                                                                                                                                                                                                              |
| Hyponatremia             | <p>Blood sodium falls below the lower age-dependent reference range</p> <ul style="list-style-type: none"> <li>• &lt; 1 months: &lt; 132 mmol/l</li> <li>• 2 – 6 months: &lt; 129 mmol/l</li> <li>• &gt; 6 months: &lt; 132 mmol/l</li> </ul>                                                                                                                                                                                                                                                                                                                                  |
| Increased blood pressure | <p>Blood pressure exceeds the upper age-dependent standard range for diastolic or diastolic blood pressure<sup>a</sup></p> <ul style="list-style-type: none"> <li>• &lt; 12 months: &gt; 56/104 mmHg (diastolic/systolic)</li> <li>• 1 – &lt; 4 years: &gt; 79/113 mmHg (diastolic/systolic)</li> <li>• 4 - &lt;7 years: &gt; 79/115 mmHg (diastolic/systolic)</li> <li>• 7 - &lt; 11 years: &gt; 83/122 mmHg (diastolic/systolic)</li> <li>• 11 - &lt; 13 years: &gt; 88/136 mmHg (diastolic/systolic)</li> <li>• ≥14 years: &gt; 77/127 mmHg (diastolic/systolic)</li> </ul> |
| Increased heart rate     | <p>Heart rate exceeds the upper age-dependent standard range for heart rate<sup>a</sup></p> <ul style="list-style-type: none"> <li>• 0 - &lt; 2 years: &gt; 180 bpm</li> <li>• 2 - &lt; 3 years: &gt; 150 bpm</li> <li>• 3 - &lt; 10 years: &gt; 140 bpm</li> <li>• 10 - &lt; 13 years: &gt; 120 bpm</li> <li>• ≥ 13 years: &gt; 110 bpm</li> </ul>                                                                                                                                                                                                                            |
| Increased PTH            | Blood PTH exceeds the upper reference range > 55 pg/ml                                                                                                                                                                                                                                                                                                                                                                                                                                                                                                                         |
| Tachypnea                | <p>Respiratory exceeds the upper age-dependent standard range for respiratory rate<sup>a</sup></p> <ul style="list-style-type: none"> <li>• &lt; 1 month: &gt; 45 breaths/min</li> <li>• 1 month - &lt; 1 year: &gt; 40 breaths/min</li> <li>• 1 - &lt; 2 years: &gt; 35 breaths/min</li> <li>• 2 - &lt; 5 years: &gt; 30 breaths/min</li> <li>• 5 - &lt; 12 years: &gt; 25 breaths/min</li> <li>• ≥ 12 years: &gt; 20 breaths/min</li> </ul>                                                                                                                                  |

a: Physicians had the possibility to adjust the individual range according to the patient's health condition.  
bpm: beats per minute; mmHG: millimeter of mercury, min: minute, mmol/l: millimoles per liter, pg/ml: picogram per milliliter; PTH: Parathyroid hormone

## Online Resource 2: Sedative drugs administered during the study period

| Sedative drugs <sup>a</sup> | Number of patient days with<br>sedative,<br>n (%)<br>( <i>N</i> =3,788 patient days) | Number of patients with<br>sedative,<br>n (%)<br>( <i>N</i> =315 patients) |
|-----------------------------|--------------------------------------------------------------------------------------|----------------------------------------------------------------------------|
| Midazolam                   | 1,011 (26.7)                                                                         | 173 (54.9)                                                                 |
| Clonidine                   | 415 (11.0)                                                                           | 30 (9.5)                                                                   |
| Phenobarbital               | 405 (10.7)                                                                           | 65 (20.6)                                                                  |
| Levomepromazine             | 247 (6.5)                                                                            | 38 (12.1)                                                                  |
| Ketamine                    | 173 (4.6)                                                                            | 71 (22.5)                                                                  |
| Propofol                    | 84 (2.2)                                                                             | 40 (12.7)                                                                  |

a: Only drugs that are sedatives according to the Anatomical-Therapeutic-Chemical (ATC) classification were considered.

Online Resource 3: Frequency of potential drug-drug interactions administered on at least 2% of patient days and their classification in the drug information databases UpToDate and Drugs.com

| Potential drug-drug interaction |                            | Number of patient days with the interaction, n (%)<br>(N=3,788 patients) | Classification        |                        |
|---------------------------------|----------------------------|--------------------------------------------------------------------------|-----------------------|------------------------|
| Drug 1                          | Drug 2                     |                                                                          | UpToDate <sup>b</sup> | Drugs.com <sup>c</sup> |
| Potassium salts <sup>a</sup>    | Metamizole                 | 972 (25.7)                                                               | C                     | n/a                    |
| Potassium salts <sup>a</sup>    | Furosemide                 | 830 (21.9)                                                               | B                     | n/a                    |
| Midazolam <sup>a</sup>          | Metamizole                 | 818 (21.6)                                                               | C                     | n/a                    |
| Potassium salts <sup>a</sup>    | Heparin                    | 641 (16.9)                                                               | C                     | n/a                    |
| Midazolam <sup>a</sup>          | Ranitidine                 | 571 (15.1)                                                               | n/a                   | Moderate               |
| Midazolam <sup>a</sup>          | Magnesium sulfate          | 437 (11.5)                                                               | C                     | n/a                    |
| Fentanyl <sup>a</sup>           | Midazolam <sup>a</sup>     | 365 (9.6)                                                                | D                     | Moderate               |
| Fentanyl <sup>a</sup>           | Furosemide                 | 318 (8.4)                                                                | C                     | Moderate               |
| Fentanyl <sup>a</sup>           | Metamizole                 | 317 (8.4)                                                                | C                     | n/a                    |
| Potassium salts <sup>a</sup>    | HCT                        | 314 (8.3)                                                                | B                     | n/a                    |
| Vancomycin <sup>a</sup>         | Metamizole                 | 283 (7.5)                                                                | C                     | n/a                    |
| Clonidine <sup>a</sup>          | Furosemide                 | 276 (7.3)                                                                | C                     | n/a                    |
| Clonidine <sup>a</sup>          | Magnesium sulfate          | 263 (6.9)                                                                | C                     | n/a                    |
| Fentanyl <sup>a</sup>           | Magnesium sulfate          | 257 (6.8)                                                                | C                     | n/a                    |
| Epinephrine <sup>a</sup>        | Albuterol                  | 247 (6.5)                                                                | C                     | Moderate               |
| Phenobarbital <sup>a</sup>      | Furosemide                 | 243 (6.4)                                                                | C                     | Moderate               |
| Vancomycin <sup>a</sup>         | Furosemide                 | 233 (6.2)                                                                | n/a                   | Moderate               |
| Clonidine <sup>a</sup>          | Midazolam <sup>a</sup>     | 228 (6.0)                                                                | C                     | Moderate               |
| Digoxin <sup>a</sup>            | Cholecalciferol            | 223 (5.9)                                                                | C                     | Moderate               |
| Digoxin <sup>a</sup>            | Furosemide                 | 223 (5.9)                                                                | n/a                   | Moderate               |
| Midazolam <sup>a</sup>          | Phenobarbital <sup>a</sup> | 221 (5.8)                                                                | C                     | Moderate               |
| Potassium salts <sup>a</sup>    | Phenobarbital <sup>a</sup> | 220 (5.8)                                                                | B                     | n/a                    |
| Digoxin <sup>a</sup>            | HCT                        | 206 (5.4)                                                                | n/a                   | Moderate               |
| Midazolam <sup>a</sup>          | Levomepromazine            | 195 (5.1)                                                                | D                     | n/a                    |
| Phenobarbital <sup>a</sup>      | Magnesium sulfate          | 192 (5.1)                                                                | C                     | n/a                    |
| Midazolam <sup>a</sup>          | HCT                        | 188 (5.0)                                                                | n/a                   | Moderate               |

| Potential drug-drug interaction |                            | Number of patient days with the interaction, n (%)<br>(N=3,788 patients) | Classification        |                        |
|---------------------------------|----------------------------|--------------------------------------------------------------------------|-----------------------|------------------------|
| Drug 1                          | Drug 2                     |                                                                          | UpToDate <sup>b</sup> | Drugs.com <sup>c</sup> |
| Midazolam <sup>a</sup>          | Theophylline               | 175 (4.6)                                                                | C                     | Minor                  |
| Potassium salts <sup>a</sup>    | Levomepromazine            | 173 (4.6)                                                                | X                     | Major                  |
| Epinephrine <sup>a</sup>        | Xylometazoline             | 172 (4.5)                                                                | C                     | n/a                    |
| Potassium salts <sup>a</sup>    | Dimenhydrinate             | 171 (4.5)                                                                | X                     | Major                  |
| Digoxin <sup>a</sup>            | Metamizole                 | 169 (4.5)                                                                | C                     | n/a                    |
| Midazolam <sup>a</sup>          | Ketamine                   | 168 (4.4)                                                                | C                     | Major                  |
| Midazolam <sup>a</sup>          | Levetiracetam              | 166 (4.4)                                                                | C                     | Moderate               |
| Potassium salts <sup>a</sup>    | Levetiracetam              | 161 (4.3)                                                                | B                     | n/a                    |
| Clonidine <sup>a</sup>          | Phenobarbital <sup>a</sup> | 159 (4.2)                                                                | C                     | Moderate               |
| Digoxin <sup>a</sup>            | Acetylsalicylic acid       | 158 (4.2)                                                                | n/a                   | Moderate               |
| Phenobarbital <sup>a</sup>      | Cholecalciferol            | 157 (4.1)                                                                | n/a                   | Moderate               |
| Potassium salts <sup>a</sup>    | Ipratropium                | 152 (4.0)                                                                | X                     | n/a                    |
| Fentanyl <sup>a</sup>           | Phenobarbital <sup>a</sup> | 139 (3.7)                                                                | D                     | Major                  |
| Digoxin <sup>a</sup>            | Calcium gluconat           | 138 (3.6)                                                                | C                     | Major                  |
| Fentanyl <sup>a</sup>           | Levomepromazine            | 130 (3.4)                                                                | D                     | Moderate               |
| Potassium salts <sup>a</sup>    | Pregabalin                 | 130 (3.4)                                                                | B                     | n/a                    |
| Potassium salts <sup>a</sup>    | Enoxaparin                 | 126 (3.3)                                                                | C                     | n/a                    |
| Potassium salts <sup>a</sup>    | Ibuprofen                  | 113 (3.0)                                                                | C                     | Moderate               |
| Digoxin <sup>a</sup>            | Midazolam                  | 111 (2.9)                                                                | n/a                   | Moderate               |
| Digoxin <sup>a</sup>            | Heparin                    | 108 (2.9)                                                                | n/a                   | Minor                  |
| Clonidine <sup>a</sup>          | Fentanyl <sup>a</sup>      | 107 (2.8)                                                                | D                     | Minor                  |
| Phenobarbital <sup>a</sup>      | Levothyroxine              | 107 (2.8)                                                                | C                     | Moderate               |
| Epinephrine <sup>a</sup>        | Digoxin <sup>a</sup>       | 104 (2.7)                                                                | n/a                   | Moderate               |
| Phenobarbital <sup>a</sup>      | Levetiracetam              | 103 (2.7)                                                                | C                     | Moderate               |
| Phenobarbital <sup>a</sup>      | Theophylline               | 103 (2.7)                                                                | C                     | Moderate               |
| Epinephrine <sup>a</sup>        | Levothyroxin               | 101 (2.7)                                                                | n/a                   | Moderate               |
| Midazolam <sup>a</sup>          | Dexamethasone              | 101 (2.7)                                                                | B                     | Minor                  |
| Digoxin <sup>a</sup>            | Pantoprazole               | 89 (2.3)                                                                 | B                     | Moderate               |

| Potential drug-drug interaction |                   | Number of patient days with the interaction, n (%)<br>(N=3,788 patients) | Classification        |                        |
|---------------------------------|-------------------|--------------------------------------------------------------------------|-----------------------|------------------------|
| Drug 1                          | Drug 2            |                                                                          | UpToDate <sup>b</sup> | Drugs.com <sup>c</sup> |
| Midazolam <sup>a</sup>          | Pregabalin        | 88 (2.3)                                                                 | C                     | Moderate               |
| Fentanyl <sup>a</sup>           | Acetaminophen     | 87 (2.3)                                                                 | B                     | n/a                    |
| Midazolam <sup>a</sup>          | Dimenhydrinate    | 87 (2.3)                                                                 | C                     | Moderate               |
| Tacrolimus <sup>a</sup>         | Metamizole        | 85 (2.2)                                                                 | X                     | n/a                    |
| Fentanyl <sup>a</sup>           | Sildenafil        | 84 (2.2)                                                                 | n/a                   | Moderate               |
| Phenobarbital <sup>a</sup>      | Levomepromazine   | 83 (2.2)                                                                 | X                     | Moderate               |
| Vancomycin <sup>a</sup>         | Cefotaxime        | 83 (2.2)                                                                 | n/a                   | Moderate               |
| Clonidine <sup>a</sup>          | Propranolol       | 82 (2.2)                                                                 | D                     | Major                  |
| Phenobarbital <sup>a</sup>      | HCT               | 81 (2.1)                                                                 | C                     | Moderate               |
| Fentanyl <sup>a</sup>           | HCT               | 80 (2.1)                                                                 | C                     | Moderate               |
| Phenobarbital <sup>a</sup>      | Domperidone       | 79 (2.1)                                                                 | C                     | n/a                    |
| Tacrolimus <sup>a</sup>         | Mycophenolic acid | 78 (2.1)                                                                 | B                     | n/a                    |
| Tacrolimus <sup>a</sup>         | Prednisolone      | 76 (2.0)                                                                 | C                     | n/a                    |

HCT: Hydrochlorothiazide; n/a: Not applicable (not listed in the respective database)

a: Categorized as high-alert medication for hospitalized pediatric patients according to Schilling et al. [6]

b: Classification used in UpToDate: “D – Consider therapy modification; C – Monitor therapy; B – No action needed. Agents may interact with each other.”

c: Classification used in Drugs.com: “Major – Avoid combinations; Moderate – Usually avoid combination. Use it only under special circumstances; Minor – Take steps to circumvent the interaction risk and/or establish a monitoring plan.”
